# Supplementary material for: Inhaler technique education in elderly patients with asthma or COPD: impact on disease exacerbations—a protocol for a single-blinded randomised controlled trial
Source: PubMed Central journal article supplement — BMJ Open. 2019 Jan 28;9(1):e022685. doi: 10.1136/bmjopen-2018-022685 (PMC6352786; doi:10.1136/bmjopen-2018-022685), 2019-01-28
Supplement: bmjopen-2018-022685supp001.pdf [file bmjopen-2018-022685supp001.pdf]

Consentimento Informado nos termos da Norma nº 015/2013 da DGS

**Estudo “Ensino da técnica inalatória em idosos com Asma e DPOC: impacto nas exacerbações”**

A sua unidade de saúde convida-o a participar no estudo “Ensino da técnica inalatória em idosos com Asma e DPOC: impacto nas exacerbações”. Foi convidado para participar neste estudo porque se trata de um doente com uma doença respiratória crónica (como Asma ou DPOC) e está a ser medicado com um dispositivo inalatório diariamente.

Os objetivos deste estudo são:

- Verificar se utiliza corretamente o seu dispositivo inalatório
- Testar se o ensino regular do uso do inalador melhora o controlo da sua doença.
- Testar se o mesmo ensino regular diminui a probabilidade de ter alguma crise de agudização/exacerbação pela sua doença, e que pode ser potencialmente fatal.

Para verificar estes objetivos iremos dividir, de forma aleatória, os utentes convidados a participar em dois grupos diferentes. Ambos os grupos irão ser avaliados regularmente sobre o controlo da sua doença, quer quando aos sintomas, qualidade de vida e quanto à sua capacidade pulmonar/respiratória. Isto será feito através da aplicação de questionários bem como da realização de um exame complementar simples e não invasivo, a espirometria.

A principal diferença entre os dois grupos, é que, um deles irá receber adicionalmente de um investigador, um ensino e treino regular sobre o uso correto dos dispositivos inalatórios, enquanto o outro grupo irá apenas receber os cuidados médicos regulares que necessitar pelo seu próprio Medico de Família.

A sua participação no estudo irá durar 12 meses. Ao aceitar participar neste estudo, será sorteado para um dos dois grupos, e após isso irá ser avaliado nesta Unidade de Saúde passados 3, 6 e 12 meses pelos investigadores. Não irá saber em nenhum momento (nem o seu Medico de Família) a qual dos grupos pertence, pois, o objetivo do estudo é não influenciar a forma como os dois grupos se comportam. Todas as consultas realizadas no âmbito deste estudo serão gratuitas para si, bem como a realização das avaliações pelos investigadores.

O estudo será coordenado pelo Dr. Tiago Maricoto, da USF Aveiro-Aradas, que é o investigador principal. A sua participação no estudo é voluntária. Poderá decidir não participar no estudo a qualquer momento sem prejuízo dos seus cuidados médicos. Todos os dados recolhidos neste estudo permanecerão confidenciais. O seu Medico de Família terá acesso no final do estudo aos resultados dos seus exames e avaliações.

O potencial benefício para a sua Saúde ao participar neste estudo é melhorar o controlo clínico da sua doença respiratória, melhorar a capacidade respiratória dos seus pulmões e diminuir o risco de crises de agudização graves e potencialmente fatais. Não existem riscos significativos para a sua saúde. Ao não participar neste estudo perde ainda a oportunidade de poder melhorar a forma como usa os seus dispositivos inalatórios, o que pode comprometer o bom controlo da sua doença a longo prazo.

---

[Parte declarativa do profissional]

Confirmando que expliquei à pessoa abaixo indicada, de forma adequada e inteligível, os procedimentos necessários ao ato referido neste documento. Respondi a todas as questões que me foram colocadas e assegurei-me de que houve um período de reflexão suficiente para a tomada da decisão. Também garanti que, em caso de recusa, serão assegurados os melhores cuidados possíveis nesse contexto, no respeito pelos seus direitos.

Nome legível do profissional de saúde: \_\_\_\_\_

Assinatura, nº de cédula profissional/mecanográfico: .....

Unidade de Saúde: \_\_\_\_\_

Contato institucional do profissional de saúde: \_\_\_\_\_

### **À Pessoa/representante**

Por favor, leia com atenção todo o conteúdo deste documento. Não hesite em solicitar mais informações se não estiver completamente esclarecido/a. Verifique se todas as informações estão corretas. Se tudo estiver conforme, então assine este documento.

[Parte declarativa da pessoa que consente]

*Declaro ter compreendido os objetivos de quanto me foi proposto e explicado pelo profissional de saúde que assina este documento, ter-me sido dada oportunidade de fazer todas as perguntas sobre o assunto e para todas elas ter obtido resposta esclarecedora, ter-me sido garantido que não haverá prejuízo para os meus direitos assistenciais se eu recusar esta solicitação, e ter-me sido dado tempo suficiente para refletir sobre esta proposta. Autorizo/Não autorizo (**riscar o que não interessa**) o ato indicado, bem como os procedimentos diretamente relacionados que sejam necessários no meu próprio interesse e justificados por razões clínicas fundamentadas.*

NOME: \_\_\_\_\_

Assinatura ..... /...../..... (data)

### **SE NÃO FOR O PRÓPRIO A ASSINAR POR IDADE OU INCAPACIDADE**

(se o menor tiver discernimento deve também assinar em cima)

NOME: .....

DOC. IDENTIFICAÇÃO N.º ..... DATA OU VALIDADE ..... /..... /.....

GRAU DE PARENTESCO OU TIPO DE REPRESENTAÇÃO: .....

ASSINATURA.....

---

O presente documento é emitido em duplicado, ficando um na posse do participante, e outro arquivado pelos investigadores em local próprio
